# Supplementary material for: The loss of sperm storage ability in females as a potential driver for increase extinction in Chondrichthyes
Source: Research Square preprint supplement (doi:10.21203/rs.3.rs-3783430/v1), 2023-12-28
Supplement: Supplementary file 1 [file 7d9d59c73ceaa0cf56ae8cd7.docx]

**The loss of sperm storage ability in females as a potential driver for increase extinction in Chondrichthyes.**

Felipe Lamarca¹² Pedro Hollanda Carvalho³ André Luiz Netto-Ferreira¹

¹ Laboratório de Ictiologia, Departamento de Zoologia, Instituto de Biociências, Universidade Federal do Rio Grande do Sul, Avenida Bento Gonçalves, 9500, Porto Alegre, Rio Grande do Sul CEP 91501-970, Brasil.

² Programa de Pós-Graduação em Biologia Animal, Instituto de Biociências, Universidade Federal do Rio Grande do Sul, Avenida Bento Gonçalves, 9500, Porto Alegre, Rio Grande do Sul CEP 91501-970, Brasil.

³ Instituto de Biodiversidade e Sustentabilidade - NUPEM, Universidade Federal do Rio de Janeiro, Avenida São José do Barreto, 764, Macaé, Rio de Janeiro CEP 27965-045, Brasil.

Correspondence: Felipe Lamarca, Universidade Federal do Rio Grande do Sul, Avenida Bento Gonçalves, 9500, Porto Alegre, Rio Grande do Sul CEP 91501-970, Brasil. E-mail: felipelamarca@hotmail.com

**Table. S1**. Summary of AE character-dependent diversification estimates in the HiSSE framework, with the best model based on Akaike value (AIC), Akaike delta (ΔAICc) and Akaike weight (WAIC) denoted in bold.

| Order | Family | Species | SS | MP | References |
| --- | --- | --- | --- | --- | --- |
| Chimaeriformes | Callorhinchidae | *Callorhinchus milii (Bory de Saint-Vincent, 1823)* | 1/1 |  | Smith et al. (2004) |
|  | Chimaeridae | *Chimaera carophila (Kemper, Ebert, Naylor & Didier, 2014)* | 2/9 |  | Finucci et al (2017a) |
|  |  | *Chimaera monstrosa (Linnaeus,1758)* | 0/3 * |  | Jordan et al. (2021); Marongiu et al. (2021) |
|  | Rhinochimaeridae | *Harriotta raleighana (Goode & Bean, 1895)* | 2/67 |  | Finucci et al. (2017b) |
|  |  | *Rhinochimaera pacifica (Mitsukuri, 1895)* | 2/16 |  | Finucci et al. (2017b) |
| Hexanchiformes | Hexanchidae | *Heptranchias perlo (Bonnaterre, 1788)* | * |  | Marongiu et al. (2021) |
|  |  | *Hexanchus griseus (Bonnaterre, 1788)* |  | 1/1 | Larson et al. (2011) |
| Pristiophoriformes | Pristiophoridae | *Pristiophorus cirratus (Latham, 1794)* |  | 1/1 | Nevatte et al. (2023) |
|  |  | *Pristiophorus nudipinnis (Günther, 1870)* |  | 1/1 | Nevatte et al. (2023) |
| Orectolobiformes | Hemiscylliidae | *Chiloscyllium punctatum (Müller & Henle, 1838)* | 1/3 |  | Bernal et al. (2015) |
|  | Ginglymostomatidae | *Ginglymostoma cirratum (Bonnaterre, 1788)* |  | 3/3; 1/1 | Heist et al. (2011); Saville et al. (2002) |
| Lamniformes | Alopidae | *Alopias vulpinus (Bonnaterre, 1788)* | 0/12 |  | Pratt (1993) |
|  |  | *Alopias superciliosus (Lowe, 1841)* | 0/4 |  | Pratt (1993) |
|  | Lamnidae | *Isurus oxyrinchus (Rafinesque, 1810)* | 0/5 | 1/1; 3/3 | Corrigan et al. (2015); Liu et al. (2020); Pratt (1993) |
|  | Odontaspididae | *Carcharias taurus (Rafinesque, 1810)* |  | 1/2; 9/15 | Chapman et al. (2013); Townsend et al., (2015) |
| Carcharhiniformes | Carcharhinidae | *Carcharhinus brevipinna* *(Müller & Henle, 1839)* | 0/1 |  | Jordan et al. (2021) |
|  |  | *Carcharhinus falciformis (Bibron, 1839)* | 1/25 |  | Hoyos-Padilla et al. (2012) |
|  |  | *Carcharhinus obscurus (Lesueur, 1818)* | 11/11 | 5/14 | Pratt (1993); Rossouw et al. (2016) |
|  |  | *Carcharhinus plumbeus (Nardo, 1827)* | 0/1; 2/17 | 1/1; 8/20; 17/20 | Daly-Engel et al. (2006); Daly-Engel et al. (2007); Jordan et al. (2021); Portnoy et al. (2007); Pratt (1993) |
|  |  | *Carcharhinus amblyrhynchos (Bleeker, 1856)* |  | 4/6 | Green et al. (2017) |
|  |  | *Carcharhinus altimus (Springer, 1950)* |  | 1/1 | Daly-Engel et al. (2006); |
|  |  | *Carcharhinus galapagensis (Snodgrass & Heller, 1905)* |  | 0/1 | Daly-Engel et al. (2006); |
|  |  | *Carcharhinus isodon (Valenciennes in Müller & Henle, 1839)* |  | 91/109 | Nash et al. (2021) |
|  |  | *Carcharhinus leucas (Valenciennes in Müller & Henle, 1839)* | 0/2 | 2/4; 9/16 | Jordan et al. (2021); Pirog et al. (2015); Pirog et al. (2019) |
|  |  | *Carcharhinus limbatus (Valenciennes in Müller & Henle, 1839)* | 0/5 | 7/14 | Jordan et al. (2021); Bester-van der Merwe et al. (2019) |
|  |  | *Carcharhinus macloti (Müller & Henle, 1839)* | 0/13 |  | Jordan et al. (2021) |
|  |  | *Carcharhinus melanopterus (Quoy & Gaimard, 1824)* | 0/2 |  | Jordan et al. (2021) |
|  |  | *Carcharhinus sorrah (Valenciennes in Müller & Henle, 1839)* | 0/8 |  | Jordan et al. (2021) |
|  |  | *Negaprion brevirostris (Poey, 1868)* |  | 1/1; 32/37; 84/97 | Feldheim et al. (2001); Feldheim et al. (2002); Feldheim et al. (2004) |
|  |  | *Loxodon macrorhinus (Müller & Henle, 1839)* | 0/50 |  | Jordan et al. (2021) |
|  |  | *Rhizoprionodon acutus (Rüppell, 1837)* | 1/124 |  | Jordan et al. (2021) |
|  |  | *Rhizoprionodon oligolinx (Springer, 1964)* | 0/1 |  |  |
|  |  | *Rhizoprionodon terraenovae (Richardson,1836)* | 5/12 |  | Pratt (1993) |
|  |  | *Prionace glauca (Linnaeus, 1758)* | 38/8; 2/2;  4/4 | 10/12 | Armada-Tapia et al. (2023); Hazin et al. (1994); Kotas & Tames, (2021); Pratt (1993) |
|  | Hemigaleidae | *Chaenogaleus macrostoma (Bleeker, 1852)* | 1/6 |  | Jordan et al. (2021) |
|  |  | *Hemipristis elongata (Klunzinger, 1871)* | 0/1 |  | Jordan et al. (2021) |
|  | Galeocerdonidae | *Galeocerdo cuvier (Péron & Lesueur, 1822)* | 1/5 | 0/4; 0/5 | Holmes et al. (2018); Pirog et al. (2020); Pratt (1993); |
|  | Sphyrnidae | *Sphyrna lewini (Griffith & Smith, 1834)* | 2/3 | 6/13; 5/5 | Green et al. (2017); Pratt, (1993); Rossouw et al. (2016) |
|  |  | *Sphyrna tiburo (Linnaeus, 1758)* | 1/1; 5/84 | 3/22 | Chapman et al. (2004); Gonzalez De Acevedo (2014); Pratt, (1993) |
|  | Pentanchidae | *Apristurus ampliceps (Sasahara, Sato & Nakaya, 2008)* | 0/1 |  | Dutilloy & Dunn, (2020) |
|  |  | *Apristurus exsanguis (Sato, Nakaya & Stewart, 1999)* | 0/6 |  | Dutilloy & Dunn, (2020) |
|  |  | *Apristurus garricki (Sato, Stewart & Nakaya, 2013)* | 0/3 |  | Dutilloy & Dunn, (2020) |
|  |  | *Apristurus sinensis (Chu & Hu, 1981)* | 0/1 |  | Dutilloy & Dunn, (2020) |
|  |  | *Galeus melastomus (Rafinesque, 1810)* | * |  | Marongiu et al. (2021) |
|  | Scyliorhinidae | *Cephaloscyllium ventriosum (Garman, 1880)* | * |  | Bernal‐Pérez et al. (2021) |
|  |  | *Galeus melastomus (Rafinesque, 1810)* | 0/1 |  | Jordan et al. (2021) |
|  |  | *Scyliorhinus canicula (Linnaeus, 1758)* | 2/32 | 12/13 | Griffiths et al. (2012); Jordan et al. (2021) |
|  |  | *Scyliorhinus retifer (Garman, 1881)* | 2/3 |  | Castro et al. (1988) |
|  |  | *Scyliorhinus stellaris (Linnaeus, 1758)* | 1/1 |  | Micarelli et al. (2016) |
|  | Triakidae | *Galeorhinus galeus (Linnaeus, 1758)* |  | 2/5 | Hernandez et al. (2014) |
|  |  | *Iago omanensis (Norman, 1939)* | *; 11/1; 97/191 |  | Fishelson & Baranes (1998); Hamlet et al. (2002a); Jordan et al. (2021) |
|  |  | *Mustelus antarcticus (Günther, 1870)* | 26/26 | 7/29 | Boomer et al. (2013); Storrie et al. (2008) |
|  |  | *Mustelus asterias (Cloquet, 1819)* | 20/33;  1/2 | 7/12 | Farrell et al. (2010); Farrell et al. (2014); Jordan et al. (2021) |
|  |  | *Mustelus californicus (Gill, 1864)* |  | 0/2 | Tárula-Marín et al. (2021) |
|  |  | *Mustelus canis (Mitchill, 1815)* | 35/35; *; 1/1 |  | Conrath & Musick (2002); Hamlett et al. (1998); Hamlett et al. (2002) |
|  |  | *Mustelus henlei (Gill, 1863)* |  | 13/14;  10/18;  13/15 | Byrne & Avise, (2012); Chabot & Haggin (2014); Rendón‐Herrera et al. (2022) |
|  |  | *Mustelus lenticulatus (Phillipps, 1932)* |  | 2/19 | Boomer et al. (2013) |
|  |  | *Mustelus mosis (Hemprich & Ehrenberg, 1899)* | 8/14 |  | Jordan et al. (2021) |
|  |  | *Mustelus mustelus (Linnaeus, 1758)* | 1/2 | 0/1;  9/19;  4/6 | Maduna et al. (2018); Marino et al. (2015); Rossouw et al. (2016) |
|  |  | *Mustelus punctulatus (Risso, 1827)* |  | 7/13 | Marino et al. (2015) |
|  |  | *Mustelus schmitti (Springer, 1939)* | * |  | Elias (2015) |
|  |  | *Triakis semifasciata (Girard, 1855)* |  | 8/22 | Nosal et al. (2013) |
| Squaliformes | Squalidae | *Squalus blainville (Risso, 1827)* | 10/10 |  | Marongiu et al. (2020) |
|  |  | *Squalus albicaudus (Viana, Carvalho & Gomes, 2016)* |  | 1/9 | Lamarca et al. (2020b) |
|  |  | *Squalus acanthias (Linnaeus, 1758)* | 0/14 | 5/29 | Jordan et al. (2021); Veríssimo et al. (2011) |
|  | Centrophoridae | *Centrophorus squamosus (Bonnaterre, 1788)* | 3/4 |  | Dutilloy & Dunn, (2020) |
|  |  | *Centrophorus uyato (Rafinesque, 1810)* | * |  | Marongiu et al. (2021) |
|  |  | *Deania calcea (Lowe, 1839)* | 0/3 |  | Dutilloy & Dunn, (2020) |
|  | Dalatidae | *Dalatias licha (Bonnaterre, 1788)* | * |  | Marongiu et al. (2021) |
|  | Etmopteridae | *Etmopterus spinax (Linnaeus, 1758)* | * |  | Porcu et al. (2014) |
|  |  | *Etmopterus granulosus (Günther, 1880)* |  | 6/18 | Nehmens et al. (2020) |
|  | Oxynotidae | *Oxynotus centrina (Linnaeus, 1758)* | * |  | Marongiu et al. (2021) |
|  | Somniosidae | *Centroscymnus coelolepis (Barbosa du Bocage & de Brito Capello, 1864)* | 593/  743 |  | Moura et al. (2011) |
|  |  | *Centroselachus crepidater (Barbosa du Bocage & de Brito Capello 1864)* | 9/14 |  | Dutilloy & Dunn, (2020) |
| Rajiformes | Arhynchobatidae | *Sympterygia acuta (Garman, 1877)* | 0/8;  2/2 |  | Galíndez & Estecondo (2008); Mabrangana et al. (2015) |
|  |  | *Sympterygia bonapartii (Müller & Henle, 1841)* | * |  | Galindez et al. (2010) |
|  | Rajidae | *Brochiraja asperula (Garrick & Paul, 1974)* | 1/8 |  | Dutilloy & Dunn, (2020) |
|  |  | *Brochiraja spinifera (Garrick & Paul, 1974)* | 0/2 |  | Dutilloy & Dunn, (2020) |
|  |  | *Beringraja binoculata (Girard, 1855)* |  | 2/3 | Jang, (2019) |
|  |  | *Dipturus oxyrinchus (Linnaeus, 1758)* | 24/32 |  | Marongiu et al. (2015) |
|  |  | *Dipturus intermedia (Parnell, 1837)* | 0/1 |  | Jordan et al. (2021) |
|  |  | *Leucoraja naevus (Müller & Henle, 1841)* | 0/11; * |  | Jordan et al. (2021);  Maia (2010) |
|  |  | *Raja brachyura (LaFont, 1871)* | 0/1; 5/5 |  | Jordan et al. (2021); Maia (2010) |
|  |  | *Raja clavata (Linnaeus, 1758)* | 0/6 | 4/4 | Chevolot et al. (2007);  Jordan et al. (2021) |
|  |  | *Raja eglanteria (Bosc, 1800)* | * |  | Hamlett et al. (1998) |
|  |  | *Raja microocellata (Montagu, 1818)* | 0/2; 1/1 |  | Jordan et al. (2021); Maia (2010) |
|  |  | *Raja miraletus (Linnaeus, 1758)* | 10/10; * |  | Maia (2010); Marongiu et al. (2015) |
|  |  | *Raja montagui (Fowler, 1910)* | * |  | Maia (2010) |
|  |  | *Raja polystigma (Regan, 1923)* | * |  | Marongiu et al. (2021) |
|  |  | *Raja undulata (Lacepède, 1802)* | 8/8 |  | Maia (2010) |
|  |  | *Rostroraja velezi (Chirichigno F., 1973)* | * |  | Soto‐López et al. (2021) |
| Rhinopristiformes | Rhinidae | *Rhina ancylostoma (Bloch & Schneider, 1801)* | 0/1 |  | Jordan et al. (2021) |
|  |  | *Rhynchobatus djiddensis (Forsskål, 1775)* | 0/1 |  | Jordan et al. (2021) |
|  | Rhinobatidae | *Acroteriobatus omanensis (Last, Henderson & Naylor, 2016)* | 0/15 |  | Jordan et al. (2021) |
|  |  | *Rhinobatos punctifer (Compagno & Randall, 1987)* | 0/2 |  | Jordan et al. (2021) |
|  |  | *Pseudobatos productus (Ayres, 1854)* | 0/42 |  | Márquez-Farías, (2007) |
|  | Trygonorrhinidae | *Zapteryx exasperata (Jordan & Gilbert, 1880)* | 0/33 |  | Blanco-Parra et al. (2009) |
| Myliobatiformes | Dasyatidae | *Hypanus sabinus (Lesueur, 1824)* | 8/10 |  | Maruska et al. (1996) |
|  | Aetobatidae | *Aetobatus narinari (Euphrasen, 1790)* |  | 1/4 | Janse et al. (2013) |
|  | Urotrygonidae | *Urobatis halleri (Cooper, 1863)* |  | 18/20 | Lyons et al. (2017) |
