# Supplementary material for: The loss of sperm storage ability in females as a potential driver for increase extinction in Chondrichthyes
Source: Research Square preprint supplement (doi:10.21203/rs.3.rs-3783430/v1), 2023-12-28
Supplement: Supplementary file 2 [file c33479cd2eeecc78530619ed.xlsx]

## Sheet: Planilha1
Model	AIC	AICc	Δ AICc	WAIC	Turnover0A	Turnove1A	Turnover0B	Turnover1B	Turnover0C	Turnover1C	Turnover0D	Turnover1D	eps0A	eps1A	eps0B	eps1B	eps0C	eps1C	eps0D	eps1D
BiSSE: all free	4644335	4644504	19854	0.00004005736	0.1442505	0.05201809							0.7381676	0.3670688
BiSSE: ε0=ε	4644525	4644645	20044	0.00003643223	0.07003424	0.05562311							0.4191592	0.4191592
BiSSE: q’s equal	4646518	4646639	22037	0.00001344827	0.1328946	0.05315726							0.7152195	0.3873514
BiSSE: ε0=ε1, q’s equal	4646054	4646135	21573	0.00001695632	0.07033864	0.05600972							0.425441	0.425441
CID-2: q’s equal	4635207	4635328	10726	0.003844424	0.04316235	0.04316235							0.3144628	0.3144628
CID-2: ε's, q's equal	4635416	4635496	10935	0.003462446	0.03771409	0.03771409							0.2119167	0.2119167
CID-4: q’s equal	4.632.01	4.633.01	7529	0.01384276	0.4165276	0.4165276	0.0355248	0.0355248	0.05832294	0.05832294	0.03485894	0.03485894	0.4427963	0.4427963	0.002061154	0.002061154	0.2715944	0.2715944	0.3952131	0.3952131
CID-4: ε’s e q’s equal	4631836	4632036	7355	0.006579510	0.3912332	0.3912332	0.0270463	0.0270463	0.08237881	0.08237881	0.03672489	0.03672489	0.2320565	0.2320565	0.2320565	0.2320565	0.2320565	0.2320565	0.2320565	0.2320565
HiSSE: q’s equal	4634132	4634497	9651	0.007101615	0.1195452	0.04200761	0.09141377	0.0466234					0.6762765	0.3655966	0.06048169	0.002061154
HiSSE: ε’s e q’s equal	4633979	4634149	9498	0.003844398	0.05057557	0.03649516	0.001794863	0.06721513					0.2439805	0.2439805	0.2439805	0.2439805
HiSSE: τ0A=τ1A=τ0B, ε0A=ε1A=ε0B, q’s equal	4635207	4635328	10726	0.003462445	0.04313851	0.04313851	0.04313851	0.04759229					0.3140813	0.3140813	0.3140813	0.002061154
HiSSE: τ0A=τ1A=τ0B, ε’s e q’s equal	4635416	4635496	10935	0.06769715	0.03771417	0.03771417	0.03771417	0.06530624					0.2119181	0.2119181	0.2119181	0.2119181
HiSSE: q0B1B=0, q1B0B=0, all other q’s equal	4629470	4629835	4989	0.000001100597	0.28911098	0.03056845	0.0560203	0.04855485					0.9414443	0.09077234	3827489	0.002061154
HiSSE: ε’s equal, q0B1B=0, q1B0B=0, all other q’s equal	4651524	4651693	27043	0.000009661130	0.0476252	0.03946835	0.2529216	0.07145629					0.294336	0.294336	0.294336	0.294336
HiSSE: τ0A=τ1A=τ0B, ε0A=ε1A=ε0B, q0B1B=0, q1B0B=0, all other q’s equal	4647179	4647300	22698	0.0000013699739	0.04115301	0.04115301	0.4115301	0.04684761					0.3156474	0.3156474	0.3156474	0.002061154
HiSSE: τ0A=τ1A=τ0B, ε’s equal, q0B1B=0, q1B0B=0, all other q’s equal	4647825	4647905	23344	0.04860262	0.03265315	0.03265315	0.03265315	0.05937469					0.15344	0.15344	0.15344	0.15344
HiSSE: τ0A=τ0B, ε0A=ε0B, q’s equal	4630133	4630359	5652	0.01930416	0.120686	0.04183027	0.120686	0.04662911					0.6802104	0.3629712	0.6802104	0.002061338
HiSSE: τ0A=τ0B, ε’s equal, q’s equal	4631979	4632100	7498	0.00235240	0.05057558	0.03649511	0.05057558	0.06721507					0.2439799	0.2439799	0.2439799	0.2439799
HiSSE: τ0A=τ0B, ε0A=ε0B, q0B1B=0, q1B0B=0, all other q’s equal	4624481	4624481	0	0.8203328	0.3166957	0.03199115	0.3166957	0.06922221					0.9519305	0.0599628	0.9519305	0.020611374
HiSSE: τ0A=τ0B, ε’s equal, q0B1B=0, q1B0B=0, all other q’s equal	4648845	4648966	24364	0.000004200315	0.03802582	0.03229521	0.03802582	0.06082675					0.1785259	0.1785259	0.1785259	0.1785259
HiSSE: τ0A=τ1A, ε0A=ε1A, q’s equal	4639207	4639433	14726	0.000195202910	0.04315345	0.04315345	0.09057524	0.04758776					0.3143589	0.3143589	0.06050754	0.002065998
HiSSE: τ0A=τ1A, ε’s equal, q’s equal	4637416	4637537	12935	0.001273770	0.03771394	0.03771394	0.1675736	0.0653062					0.2119174	0.2119174	0.2119174	0.2119174
HiSSE: τ0A=τ1A, ε0A=ε1A, q0B1B=0, q1B0B=0, all other q’s equa	4655765	4655991	31284	0.0000000132027	0.07204071	0.07204071	0.1810665	0.01779953					0.4977595	0.4977595	0.1151606	0.002061154
HiSSE: τ0A=τ1A, ε’s equal, q0B1B=0, q1B0B=0, all other q’s equal	4649825	4649945	25344	0.000002574213	0.03265317	0.03265317	0.1197224	0.0593749					0.1534424	0.1534424	0.1534424	0.1534424

## Sheet: Planilha2
Model	AIC	AICc	ΔAICc	WAIC	Turnover0A	Turnover0B	Turnover0C	Turnover0D	Turnover0E	eps0A	eps0B	eps0C	eps0D	eps0E
1 hidden state, ε’s egual	4622588	4622612	32264	0.00000003149813	0.04318213					0.3317531
2 hidden states, ε’s egual	4591307	4591387	983	0.1953384	0.03712398	0.01596637				0.00040916	0.00040916
3 hidden states, ε’s egual	4591194	4591315	870	0.2066755	0.03872727	0.01578748	0.01578840			0.002061154	0.002061154	0.002061154
4 hidden states, ε’s egual	4590324	4590324	0	0.3192977	0.0456287	0.01582031	0.01582033	0.03108345		0.003021894	0.003021894	0.003021894	0.003021894
5 hidden states, ε’s egual	4592530	4592756	2206	0.1059718	0.0597859	0.01603115	0.03268585	0.03268585	0.03268578	0.002061154	0.002061154	0.002061154	0.002061154	0.002061154
2 hidden states all free	4593307	4593428	2983	0.07186101	0.03712401	0.01596612				0.002061154	0.002061154
3 hidden states all free	4593037	4593264	2713	0.08223880	0.01593593	0.04497544	0.03058854			0.002061368	0.002061368	0.002061368
4 hidden states all free	4596324	4596689	6000	0.01589689	0.03108642	0.015822189	0.04562819	0.01581963		0.002061154	0.020611749	0.002098383	0.002061154
5 hidden states all free	4599855	4600393	9531	0.002719805	0.01559015	0.01559076	0.04672826	0.03089237	0.03089233	0.002061154	0.020633689	0.002061154	0.002061154	0.002061154
